# Supplementary material for: FtsK is critical for the assembly of the unique divisome complex of the FtsZ-less Chlamydia trachomatis
Source: eLife. 2025 Apr 7;13:RP104199. doi: 10.7554/eLife.104199 (PMC11975371; doi:10.7554/eLife.104199)
Supplement: Supplementary file 1. — (A) List of primers and plasmids used for cloning mCherry fusions of FtsK, PBP2, PBP3, MreB, and MreC. (B) List of primers used for RT-qPCR. [file elife-104199-supp1.xlsx]

## Sheet: Sheet1
Supplemental File 1A
Primer Name	Primer Sequence (5'-3')	GC content (%)	TM (°C)
FtsK_mCherry (fwd)	AGAGGAGAAAGGATCTGCGGCCGCATGGGAAAAGAACGGAAGAAAGCAAG	52	72.8
FtsK_mCherry (rvs)	CCCTTAGAGACCATTGCGGCCGCATCGTCCTGATTTGATAATTGGACTAGTATTTGAC	47	72.4
mCherry_PBP2 (fwd)	ATGGTCTCTAAGGGCGAGGAAGAC	54	59.1
mCherry_PBP2 (rvs)	ATGGTCGACCGGTACCTTAGCTGAAAGATTTTTTACGAATCTCTTCCCATTTCTCTATC	41	70.2
mCherry_PBP3 (fwd)	ATGGTCTCTAAGGGCGAGGAAGAC	54	59.1
mCherry_PBP3 (rvs)	ATGGTCGACCGGTACCCTATTTGCGATTCCATTCCTCATATAGCAG	48	69.9
mCherry_MreC (fwd)	ATGGTCTCTAAGGGCGAGGAAGAC	54	59.1
mCherry_MreC (rvs)	ATGGTCGACCGGTACCCTACTCCCAAATCAAACCAAAAATATCAGGACG	47	70.4
Plasmid	pBOMB4-Tet
Supplemental File 1B
Primer Name	Primer Sequence (5'-3')	GC content (%)	TM (°C)
Ct739 ftsk FWD Set 1	CGACTCCAAGTTCCTCTTCTTC	39.1	55.2
Ct739 ftsK REV Set 1	GATCCAGTGGTTCCTGCAATA	47.6	54.6
Ct682 pbp2 FWD Set 1	TAACACTGACGCGGAACATAG	47.6	55.1
Ct682 pbp2 REV Set 1	CCGAAAGCATGAGCAGATAGA	47.6	54.8
(Ct443 omcB), Assay Set 3	CGGTAGGATCTCCCTATCCTATT	47.6	54.4
(Ct443 omcB), Assay Set 3	CGAACTCTGCTTCACATGGTA	47.6	55
Batch Item 4 (Ct446 euo), Assay Set 4	CGAAGACTACTCGTTGGGAAATA	43.5	54.7
Batch Item 4 (Ct446 euo), Assay Set 4	AACAGAAGCTCTCCTTGATAAGT	39.1	53.8
